# Supplementary material for: Observation of cirrus clouds with GLORIA during the WISE campaign: detection methods and cirrus characterization
Source: Copernicus journal article supplement (doi:10.5194/amt-14-3153-2021), 2021-04-29
Supplement: Supplementary file 1 [file amt-14-3153-2021-supplement.pdf]

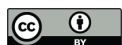

*Supplement of*

## **Observation of cirrus clouds with GLORIA during the WISE campaign: detection methods and cirrus characterization**

**Irene Bartolome Garcia et al.**

*Correspondence to:* Irene Bartolome Garcia ([i.bartolome@fz-juelich.de](mailto:i.bartolome@fz-juelich.de))

The copyright of individual parts of the supplement might differ from the article licence.

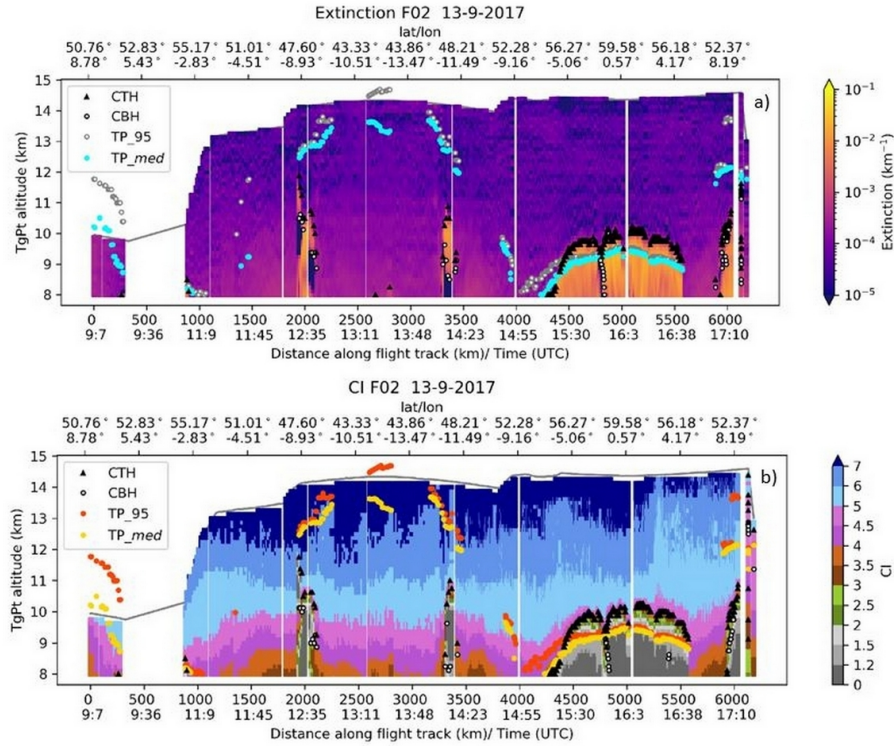

**Figure S1.** Cross-sections of extinction (a) and cloud index (b) for flight 2 of the WISE campaign. The results are restricted to levels below flight path. (a) Color code for extinction in  $\text{km}^{-1}$ . Orange-pink colors indicate the presence of clouds. (b) Color code for CI. Depending on the altitude, CI values below 2 to 5 (colors from grey to pink) indicate the presence of clouds. Median tropopause (TP<sub>med</sub>) and the 95th percentile of the tropopause (TP<sub>95</sub>) are represented with orange and yellow circles, respectively. Cloud top height (CTH) and cloud bottom height (CBH) are represented with a black triangle and with a white circle, respectively. The altitude of the tangent points (TgPt) is the y axis. The white areas in both cross-sections correspond to a first filtering of optically thicker regions ( $\text{CI} < 2$ ).

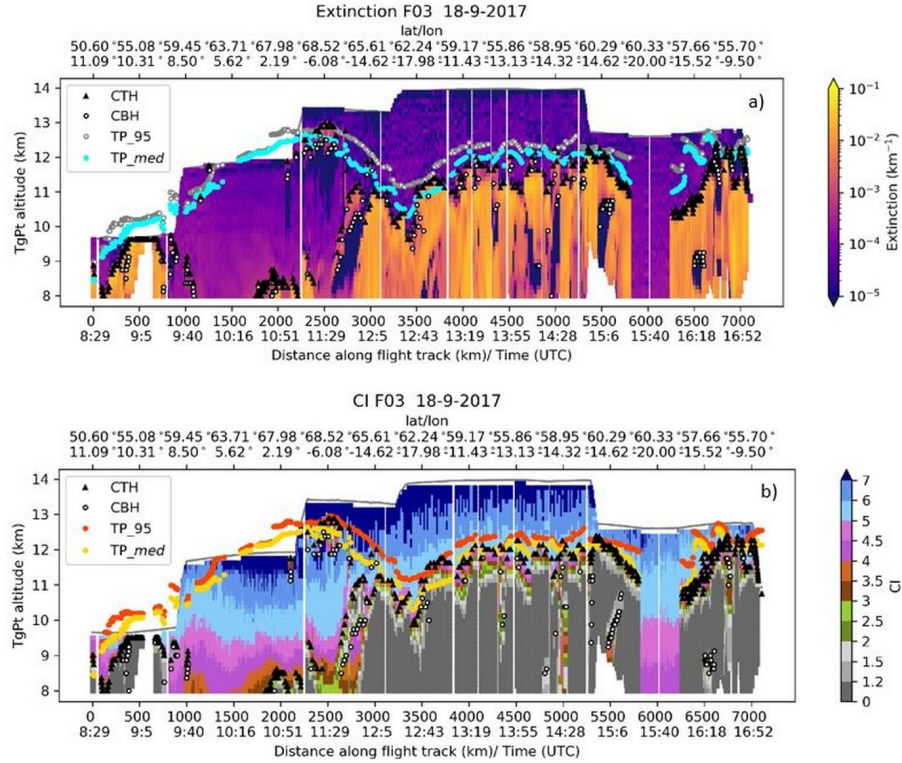

**Figure S2.** Cross-sections of extinction (a) and cloud index (b) for flight 3 of the WISE campaign. The results are restricted to levels below flight path. (a) Color code for extinction in  $\text{km}^{-1}$ . Orange-pink colors indicate the presence of clouds. (b) Color code for CI. Depending on the altitude, CI values below 2 to 5 (colors from grey to pink) indicate the presence of clouds. Median tropopause ( $TP_{med}$ ) and the 95th percentile of the tropopause ( $TP_{95}$ ) are represented with orange and yellow circles, respectively. Cloud top height (CTH) and cloud bottom height (CBH) are represented with a black triangle and with a white circle, respectively. The altitude of the tangent points (TgPt) is the y axis. The white areas in both cross-sections correspond to a first filtering of optically thicker regions ( $CI < 2$ ).

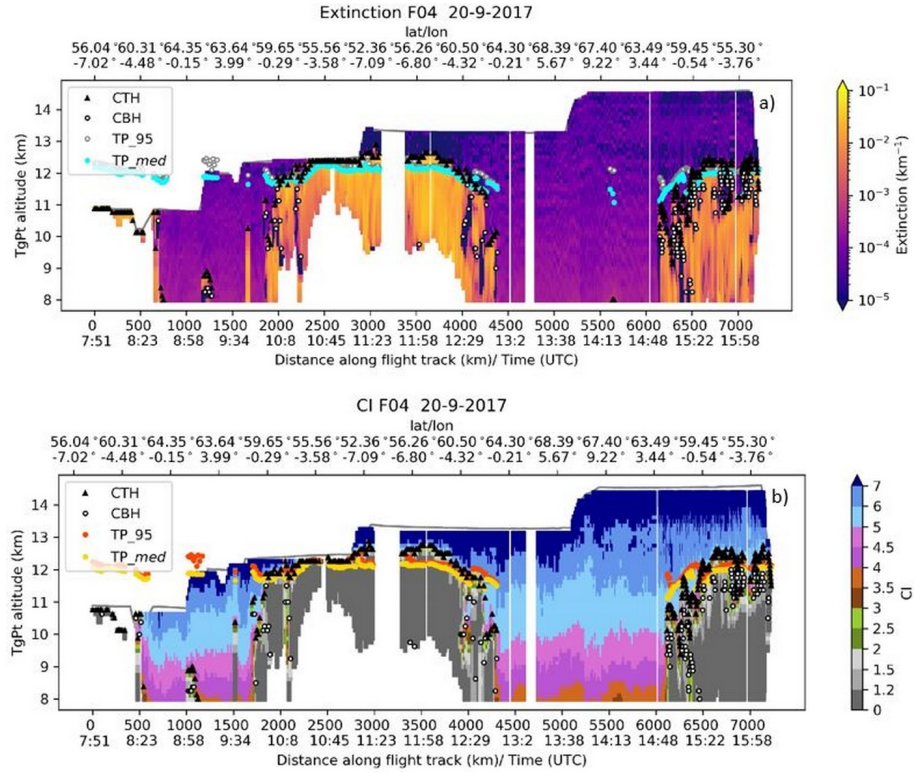

**Figure S3.** Cross-sections of extinction (a) and cloud index (b) for flight 4 of the WISE campaign. The results are restricted to levels below flight path. (a) Color code for extinction in  $\text{km}^{-1}$ . Orange-pink colors indicate the presence of clouds. (b) Color code for CI. Depending on the altitude, CI values below 2 to 5 (colors from grey to pink) indicate the presence of clouds. Median tropopause ( $\text{TP}_{\text{med}}$ ) and the 95th percentile of the tropopause ( $\text{TP}_{95}$ ) are represented with orange and yellow circles, respectively. Cloud top height (CTH) and cloud bottom height (CBH) are represented with a black triangle and with a white circle, respectively. The altitude of the tangent points (TgPt) is the y axis. The white areas in both cross-sections correspond to a first filtering of optically thicker regions ( $\text{CI} < 2$ ).



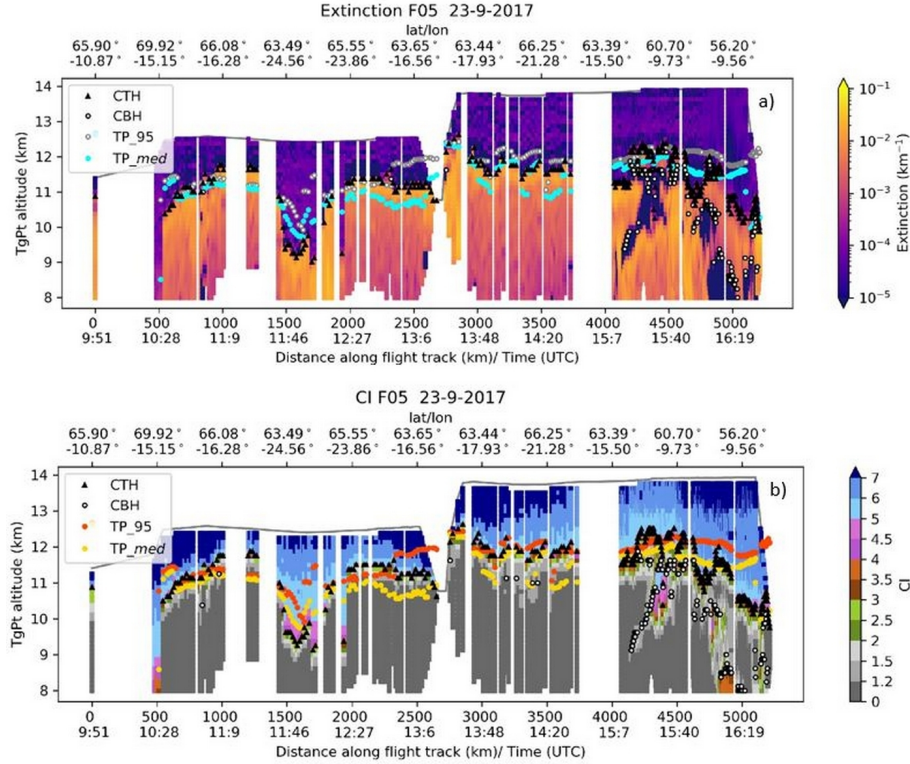

**Figure S4.** Cross-sections of extinction (a) and cloud index (b) for flight 5 of the WISE campaign. The results are restricted to levels below flight path. (a) Color code for extinction in  $\text{km}^{-1}$ . Orange-pink colors indicate the presence of clouds. (b) Color code for CI. Depending on the altitude, CI values below 2 to 5 (colors from grey to pink) indicate the presence of clouds. Median tropopause (TP<sub>med</sub>) and the 95th percentile of the tropopause (TP<sub>95</sub>) are represented with orange and yellow circles, respectively. Cloud top height (CTH) and cloud bottom height (CBH) are represented with a black triangle and with a white circle, respectively. The altitude of the tangent points (TgPt) is the y axis. The white areas in both cross-sections correspond to a first filtering of optically thicker regions ( $\text{CI} < 2$ ).

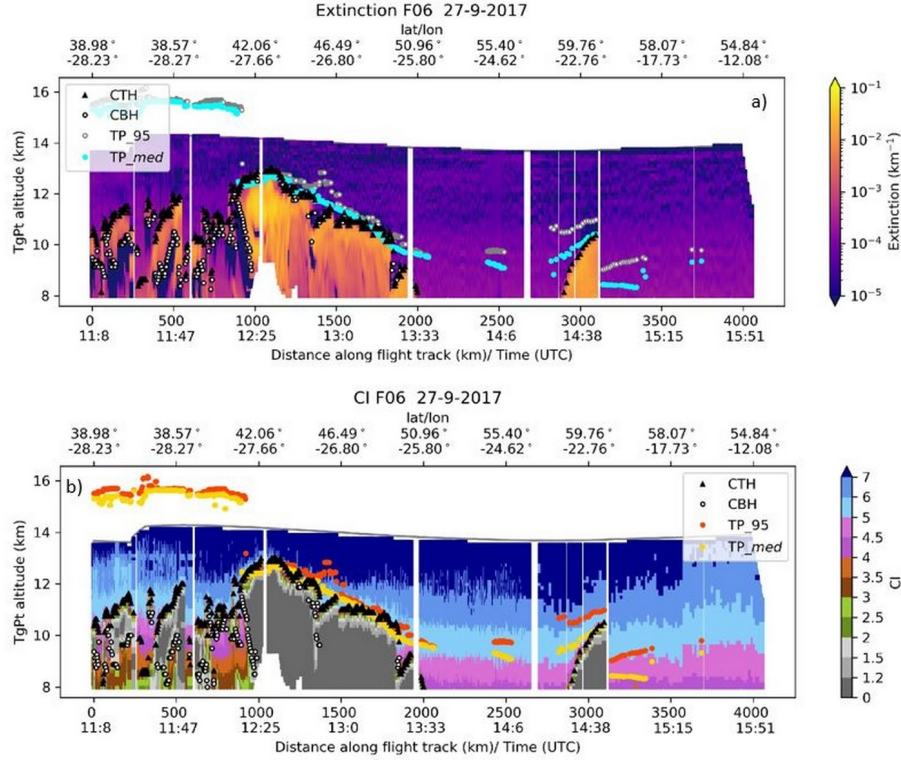

**Figure S5.** Cross-sections of extinction (a) and cloud index (b) for flight 6 of the WISE campaign. The results are restricted to levels below flight path. (a) Color code for extinction in  $\text{km}^{-1}$ . Orange-pink colors indicate the presence of clouds. (b) Color code for CI. Depending on the altitude, CI values below 2 to 5 (colors from grey to pink) indicate the presence of clouds. Median tropopause (TP<sub>med</sub>) and the 95th percentile of the tropopause (TP<sub>95</sub>) are represented with orange and yellow circles, respectively. Cloud top height (CTH) and cloud bottom height (CBH) are represented with a black triangle and with a white circle, respectively. The altitude of the tangent points (TgPt) is the y axis. The white areas in both cross-sections correspond to a first filtering of optically thicker regions ( $\text{CI} < 2$ ).

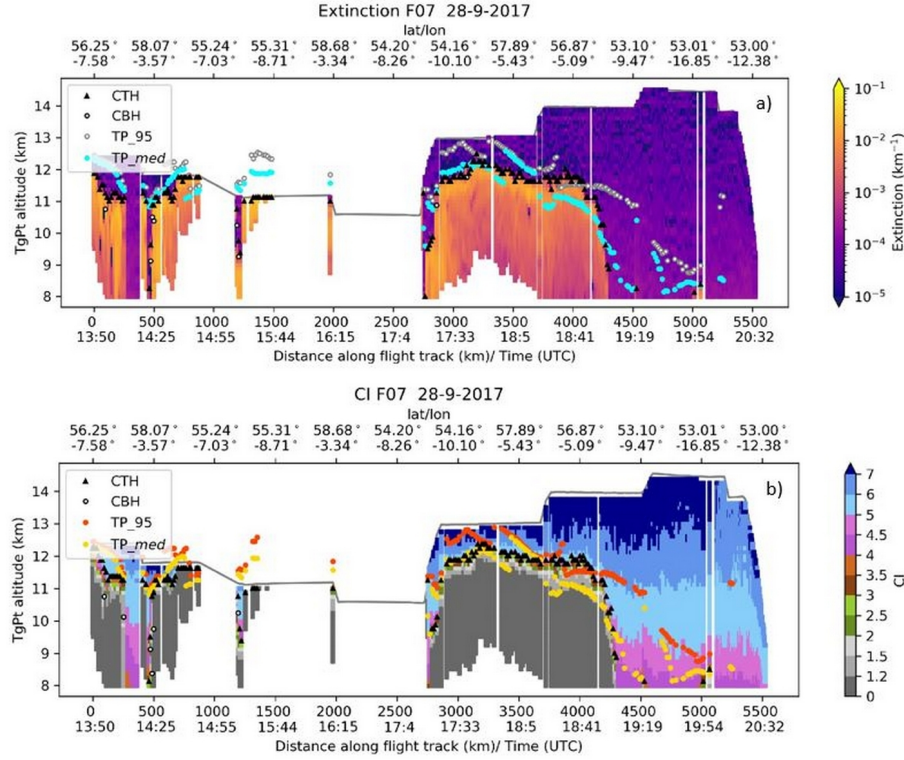

**Figure S6.** Cross-sections of extinction (a) and cloud index (b) for flight 7 of the WISE campaign. The results are restricted to levels below flight path. (a) Color code for extinction in  $\text{km}^{-1}$ . Orange-pink colors indicate the presence of clouds. (b) Color code for CI. Depending on the altitude, CI values below 2 to 5 (colors from grey to pink) indicate the presence of clouds. Median tropopause (TP<sub>med</sub>) and the 95th percentile of the tropopause (TP<sub>95</sub>) are represented with orange and yellow circles, respectively. Cloud top height (CTH) and cloud bottom height (CBH) are represented with a black triangle and with a white circle, respectively. The altitude of the tangent points (TgPt) is the y axis. The white areas in both cross-sections correspond to a first filtering of optically thicker regions (CI < 2).

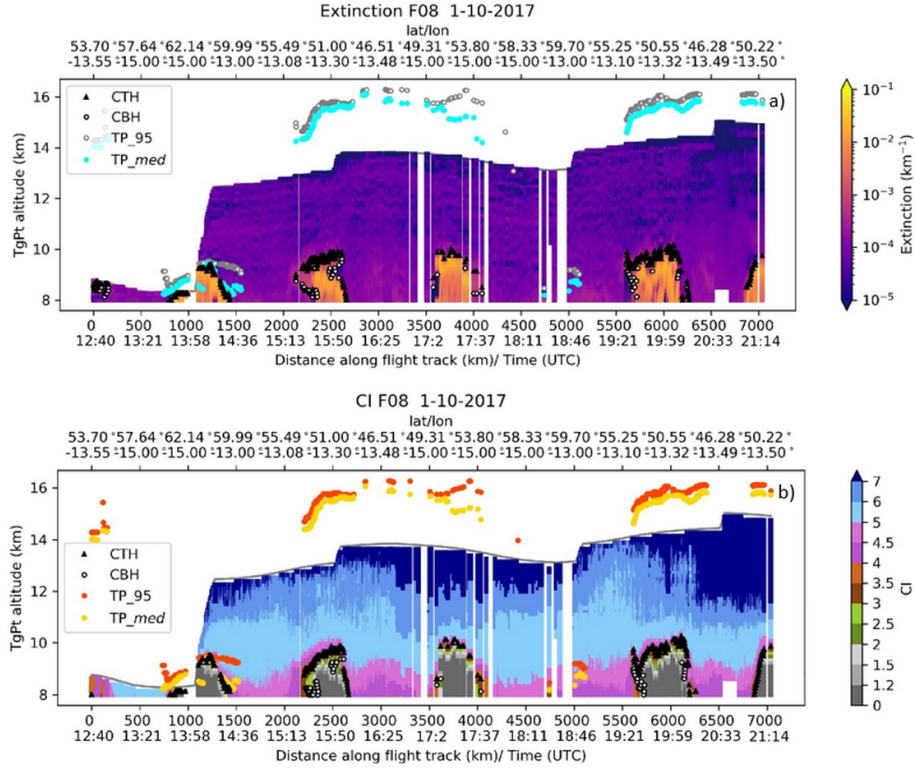

**Figure S7.** Cross-sections of extinction (a) and cloud index (b) for flight 8 of the WISE campaign. The results are restricted to levels below flight path. (a) Color code for extinction in  $\text{km}^{-1}$ . Orange-pink colors indicate the presence of clouds. (b) Color code for CI. Depending on the altitude, CI values below 2 to 5 (colors from grey to pink) indicate the presence of clouds. Median tropopause ( $\text{TP}_{\text{med}}$ ) and the 95th percentile of the tropopause ( $\text{TP}_{95}$ ) are represented with orange and yellow circles, respectively. Cloud top height (CTH) and cloud bottom height (CBH) are represented with a black triangle and with a white circle, respectively. The altitude of the tangent points (TgPt) is the y axis. The white areas in both cross-sections correspond to a first filtering of optically thicker regions ( $\text{CI} < 2$ ).

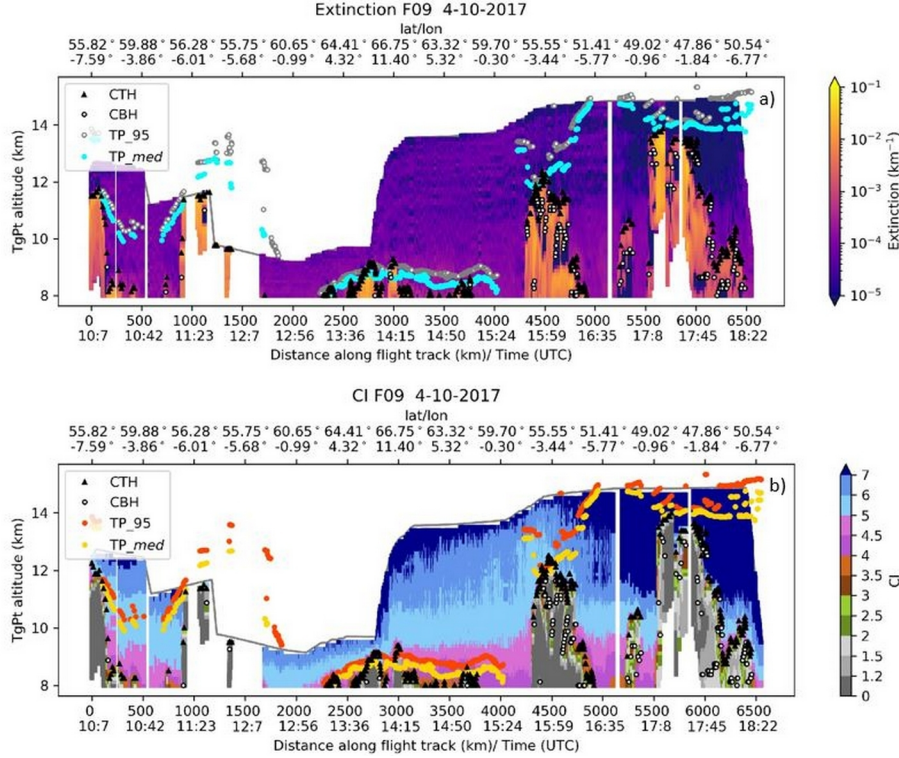

**Figure S8.** Cross-sections of extinction (a) and cloud index (b) for flight 9 of the WISE campaign. The results are restricted to levels below flight path. (a) Color code for extinction in  $\text{km}^{-1}$ . Orange-pink colors indicate the presence of clouds. (b) Color code for CI. Depending on the altitude, CI values below 2 to 5 (colors from grey to pink) indicate the presence of clouds. Median tropopause (TP<sub>med</sub>) and the 95th percentile of the tropopause (TP<sub>95</sub>) are represented with orange and yellow circles, respectively. Cloud top height (CTH) and cloud bottom height (CBH) are represented with a black triangle and with a white circle, respectively. The altitude of the tangent points (TgPt) is the y axis. The white areas in both cross-sections correspond to a first filtering of optically thicker regions (CI < 2).



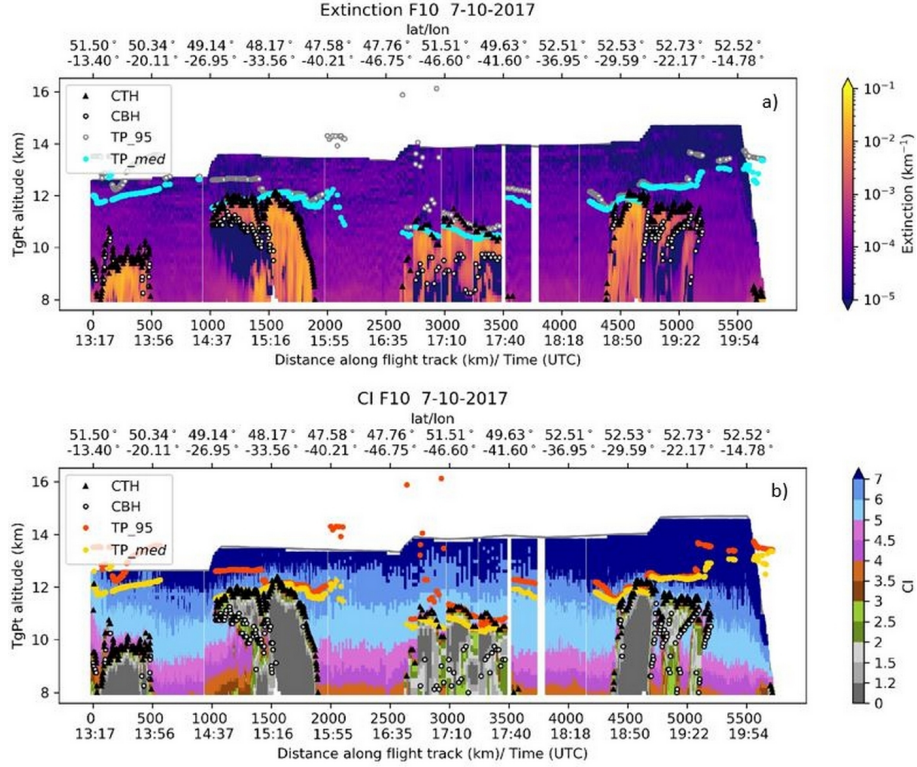

**Figure S9.** Cross-sections of extinction (a) and cloud index (b) for flight 10 of the WISE campaign. The results are restricted to levels below flight path. (a) Color code for extinction in  $\text{km}^{-1}$ . Orange-pink colors indicate the presence of clouds. (b) Color code for CI. Depending on the altitude, CI values below 2 to 5 (colors from grey to pink) indicate the presence of clouds. Median tropopause ( $\text{TP}_{\text{med}}$ ) and the 95th percentile of the tropopause ( $\text{TP}_{95}$ ) are represented with orange and yellow circles, respectively. Cloud top height (CTH) and cloud bottom height (CBH) are represented with a black triangle and with a white circle, respectively. The altitude of the tangent points (TgPt) is the y axis. The white areas in both cross-sections correspond to a first filtering of optically thicker regions ( $\text{CI} < 2$ ).



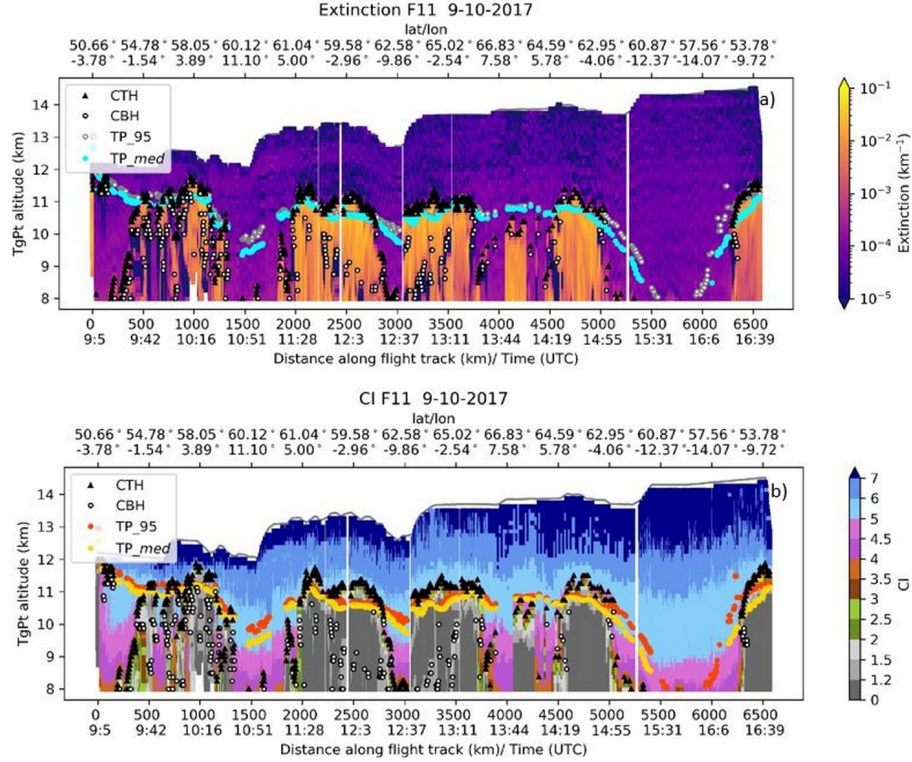

**Figure S10.** Cross-sections of extinction (a) and cloud index (b) for flight 11 of the WISE campaign. The results are restricted to levels below flight path. (a) Color code for extinction in  $\text{km}^{-1}$ . Orange-pink colors indicate the presence of clouds. (b) Color code for CI. Depending on the altitude, CI values below 2 to 5 (colors from grey to pink) indicate the presence of clouds. Median tropopause (TP<sub>med</sub>) and the 95th percentile of the tropopause (TP<sub>95</sub>) are represented with orange and yellow circles, respectively. Cloud top height (CTH) and cloud bottom height (CBH) are represented with a black triangle and with a white circle, respectively. The altitude of the tangent points (TgPt) is the y axis. The white areas in both cross-sections correspond to a first filtering of optically thicker regions ( $\text{CI} < 2$ ).

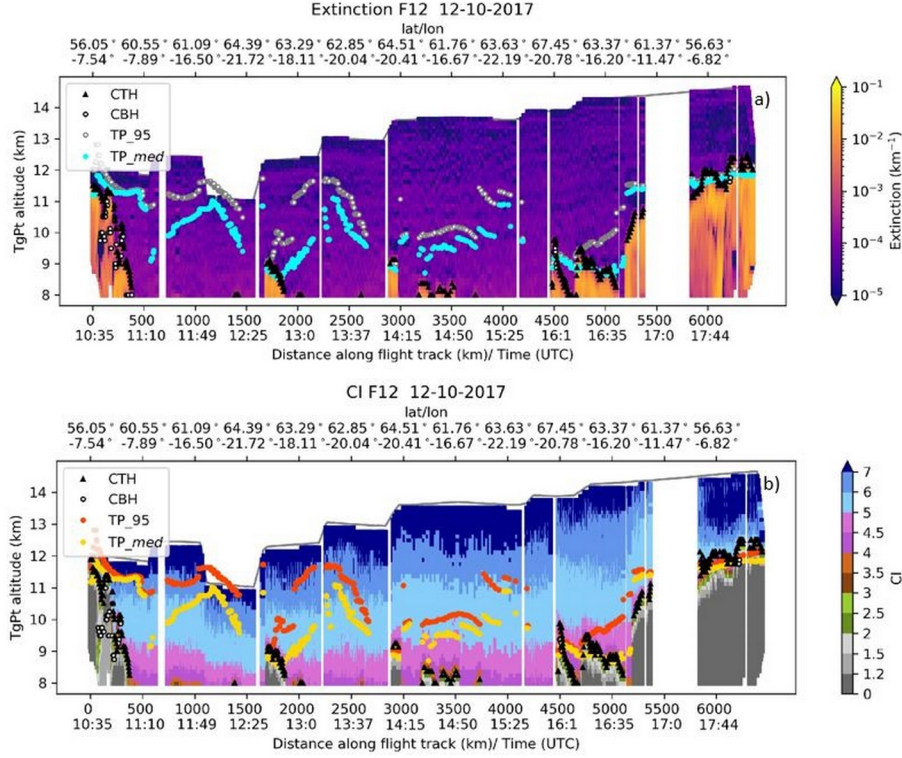

**Figure S11.** Cross-sections of extinction (a) and cloud index (b) for flight 12 of the WISE campaign. The results are restricted to levels below flight path. (a) Color code for extinction in  $\text{km}^{-1}$ . Orange-pink colors indicate the presence of clouds. (b) Color code for CI. Depending on the altitude, CI values below 2 to 5 (colors from grey to pink) indicate the presence of clouds. Median tropopause ( $\text{TP}_{\text{med}}$ ) and the 95th percentile of the tropopause ( $\text{TP}_{95}$ ) are represented with orange and yellow circles, respectively. Cloud top height (CTH) and cloud bottom height (CBH) are represented with a black triangle and with a white circle, respectively. The altitude of the tangent points (TgPt) is the y axis. The white areas in both cross-sections correspond to a first filtering of optically thicker regions ( $\text{CI} < 2$ ).

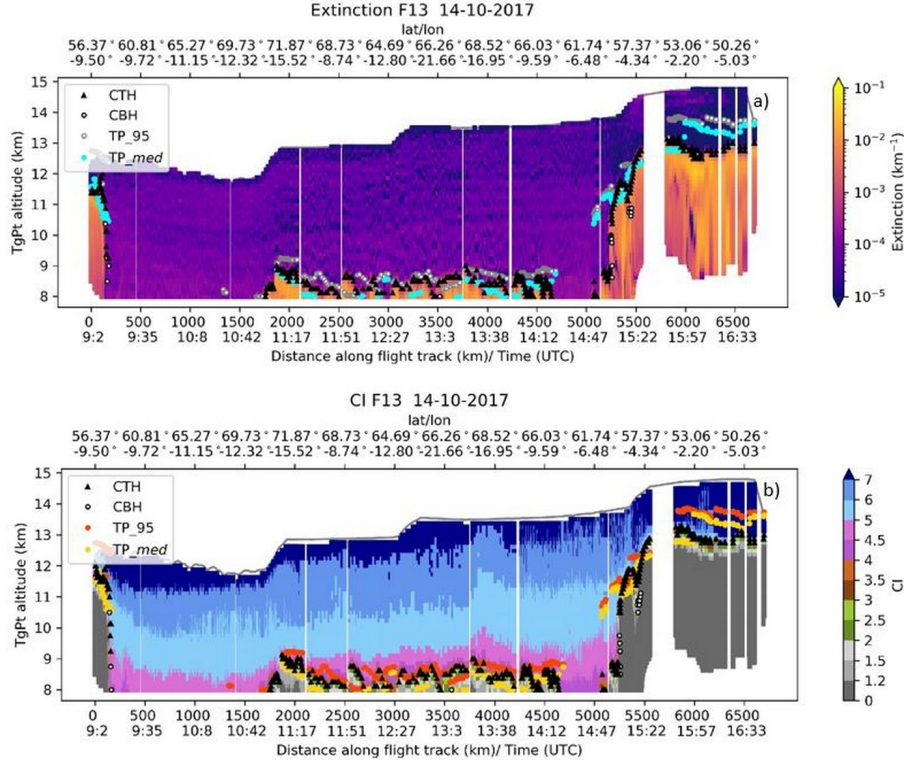

**Figure S12.** Cross-sections of extinction (a) and cloud index (b) for flight 13 of the WISE campaign. The results are restricted to levels below flight path. (a) Color code for extinction in  $\text{km}^{-1}$ . Orange-pink colors indicate the presence of clouds. (b) Color code for CI. Depending on the altitude, CI values below 2 to 5 (colors from grey to pink) indicate the presence of clouds. Median tropopause (TP<sub>med</sub>) and the 95th percentile of the tropopause (TP<sub>95</sub>) are represented with orange and yellow circles, respectively. Cloud top height (CTH) and cloud bottom height (CBH) are represented with a black triangle and with a white circle, respectively. The altitude of the tangent points (TgPt) is the y axis. The white areas in both cross-sections correspond to a first filtering of optically thicker regions (CI < 2).

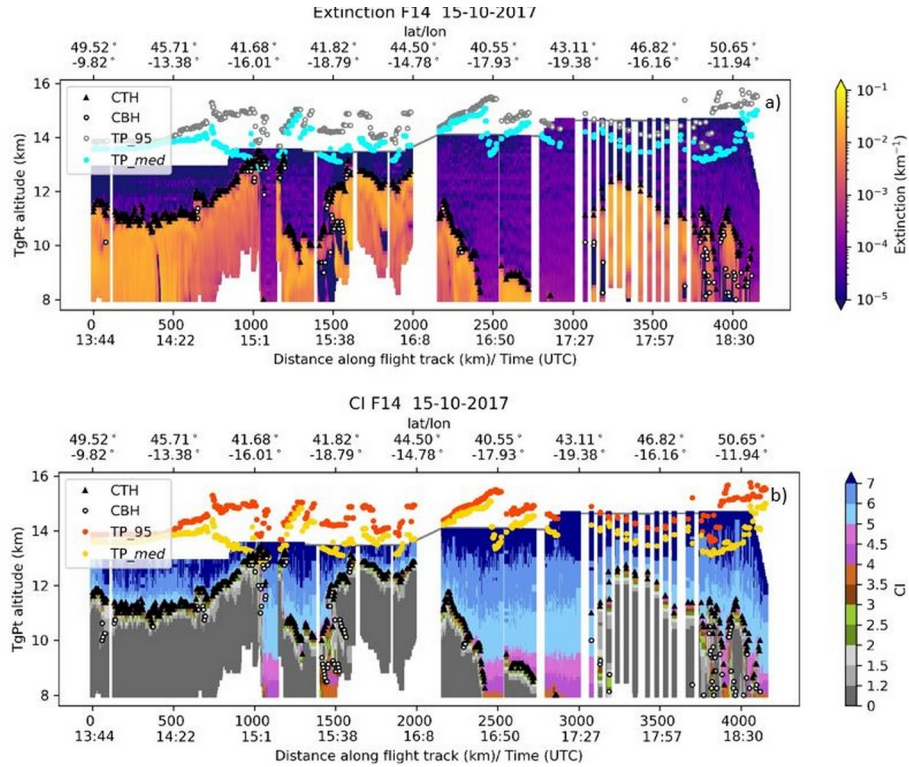

**Figure S13.** Cross-sections of extinction (a) and cloud index (b) for flight 14 of the WISE campaign. The results are restricted to levels below flight path. (a) Color code for extinction in  $\text{km}^{-1}$ . Orange-pink colors indicate the presence of clouds. (b) Color code for CI. Depending on the altitude, CI values below 2 to 5 (colors from grey to pink) indicate the presence of clouds. Median tropopause ( $\text{TP}_{\text{med}}$ ) and the 95th percentile of the tropopause ( $\text{TP}_{95}$ ) are represented with orange and yellow circles, respectively. Cloud top height (CTH) and cloud bottom height (CBH) are represented with a black triangle and with a white circle, respectively. The altitude of the tangent points (TgPt) is the y axis. The white areas in both cross-sections correspond to a first filtering of optically thicker regions ( $\text{CI} < 2$ ).



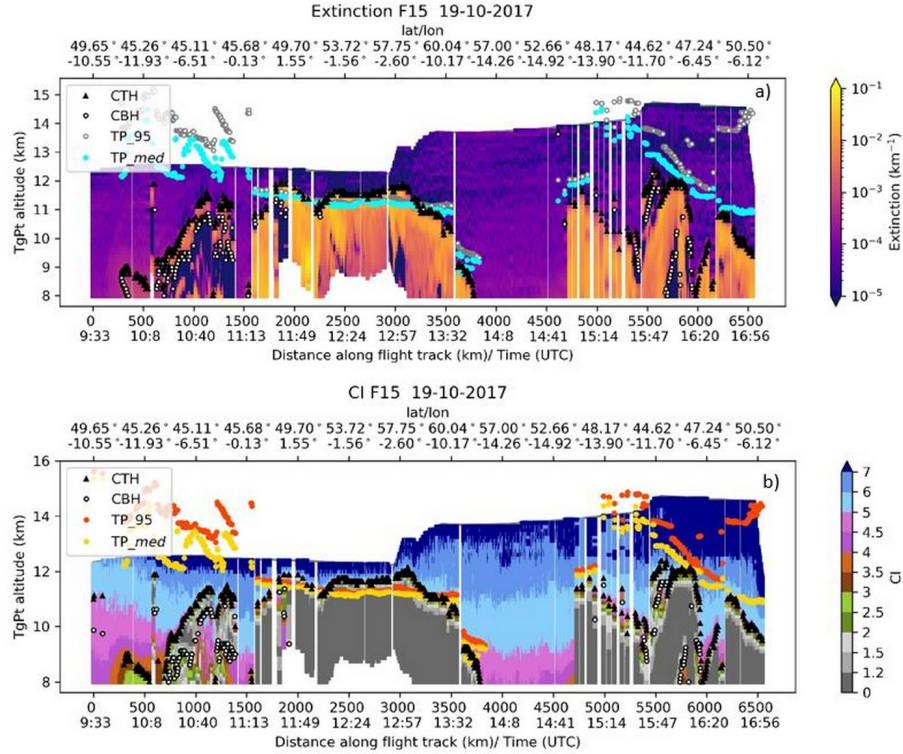

**Figure S14.** Cross-sections of extinction (a) and cloud index (b) for flight 15 of the WISE campaign. The results are restricted to levels below flight path. (a) Color code for extinction in  $\text{km}^{-1}$ . Orange-pink colors indicate the presence of clouds. (b) Color code for CI. Depending on the altitude, CI values below 2 to 5 (colors from grey to pink) indicate the presence of clouds. Median tropopause ( $\text{TP}_{\text{med}}$ ) and the 95th percentile of the tropopause ( $\text{TP}_{95}$ ) are represented with orange and yellow circles, respectively. Cloud top height (CTH) and cloud bottom height (CBH) are represented with a black triangle and with a white circle, respectively. The altitude of the tangent points (TgPt) is the y axis. The white areas in both cross-sections correspond to a first filtering of optically thicker regions ( $\text{CI} < 2$ ).

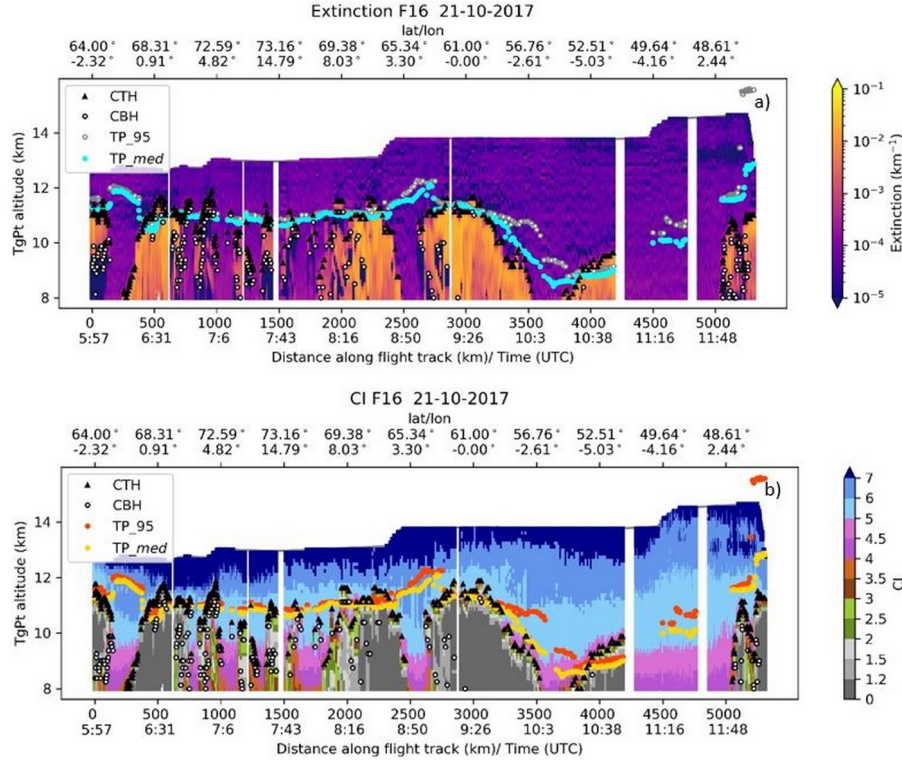

**Figure S15.** Cross-sections of extinction (a) and cloud index (b) for flight 16 of the WISE campaign. The results are restricted to levels below flight path. (a) Color code for extinction in  $\text{km}^{-1}$ . Orange-pink colors indicate the presence of clouds. (b) Color code for CI. Depending on the altitude, CI values below 2 to 5 (colors from grey to pink) indicate the presence of clouds. Median tropopause ( $TP_{med}$ ) and the 95th percentile of the tropopause ( $TP_{95}$ ) are represented with orange and yellow circles, respectively. Cloud top height (CTH) and cloud bottom height (CBH) are represented with a black triangle and with a white circle, respectively. The altitude of the tangent points (TgPt) is the y axis. The white areas in both cross-sections correspond to a first filtering of optically thicker regions ( $CI < 2$ ).
